# Supplementary material for: Generalised joint hypermobility increases ACL injury risk and is associated with inferior outcome after ACL reconstruction: a systematic review
Source: PubMed Central journal article supplement — BMJ Open Sport Exerc Med. 2019 Nov 10;5(1):e000620. doi: 10.1136/bmjsem-2019-000620 (PMC6863654; doi:10.1136/bmjsem-2019-000620), 2019-11-10
Supplement: bmjsem-2019-000620supp001.pdf [file bmjsem-2019-000620supp001.pdf]

## 1 Scoring method – MINORS

2  
3 (Items 8-12 were only used for comparative studies. Items 6 and 7 were not used for case-control studies.)

4  
5 **1. A clearly stated aim: the question addressed should be precise and relevant in the light of the available**

6 **literature.**

7 **Item 1**

8 0: Aim not reported

9 1: Aim reported but not precise

10 2: Aim is precise (if the primary aim includes an analysis of risk factors in general, this is fulfilled, GJH does not  
11 have to be specifically mentioned).

12  
13 **2. Inclusion of consecutive patients: all patients potentially fit for inclusion (satisfying the criteria for**  
14 **inclusion) have been included in the study during the study period (no exclusion or details about the reasons**  
15 **for exclusion).**

16 **Item 2**

17 0: Inclusion not reported

18 1: Inclusion reported but not consecutive

19 2: Inclusion of consecutive patients, or reasons for exclusion were reported

20  
21 **3. Prospective collection of data: data were collected according to a protocol established before the**  
22 **beginning of the study.**

23 **Item 3**

24 0: Timing of the writing of the protocol in relation to the collection of data not reported

25 1: Timing of the writing of the protocol in relation to the collection of data was reported but not prospective

26 2: Prospective collection of data

27  
28 **4. Endpoints appropriate to the aim of the study: unambiguous explanation of the criteria used to evaluate**  
29 **the main outcome, which should be in accordance with the question addressed by the study. Moreover, the**  
30 **endpoints should be assessed on an intention-to-treat basis.**

31 **Item 4<sup>P</sup>**

32 0: Endpoints not reported

33 1: Clinical endpoints but not ACL rupture, graft rupture, or clinical outcome variables deemed irrelevant or not  
34 sufficiently specified by the first author

35 2: The endpoints used are ACL rupture, graft rupture, or clinical outcome variables deemed relevant by the first  
36 author. In case-control studies, investigating the incidence of ACL rupture, the implemented hypermobility  
37 score had to be reported.

38  
39 **5. Unbiased assessment of the study endpoint: blind evaluation of objective endpoints and double-blind**  
40 **evaluation of subjective endpoints. Otherwise, the reasons for not blinding should be stated.**

41 **Item 5<sup>Q</sup>**

42 0: Evaluation of endpoints not blinded or not reported

43 1: Blind evaluations of objective endpoints and double-blind evaluation of subjective endpoints, but  
44 inadequate blinding or reasons for not blinding were reported.

45 2: Blind evaluations of objective endpoints and double-blind evaluation of subjective endpoints

46  
47 **6. Follow-up period appropriate to the aim of the study: the follow-up should be sufficiently long to allow**  
48 **the assessment of the main endpoint and possible adverse events.**

49 **Item 6<sup>R</sup>**

50 0: Follow-up period not reported

51 1: Follow-up period reported but less than mean two years

52 2: Follow up period mean two years or longer

53  
54 **7. Loss to follow-up less than 5%: all patients should be included in the follow-up. Otherwise, the proportion**  
55 **lost to follow-up should not exceed the proportion experiencing the major endpoint.**

- 56 **Item 7<sup>S</sup>**  
 57 0: Loss to follow-up not reported  
 58 1: Loss to follow-up 5% or more  
 59 2: Loss to follow-up less than 5%. Or, the number of patients lost to follow-up should not exceed the  
 60 proportion experiencing the major endpoint<sup>1</sup>.  
 61  
 62 **8. Prospective calculation of the study size: information on the size of the detectable difference of interest**  
 63 **with a calculation of 95% confidence interval, according to the expected incidence of the outcome event, and**  
 64 **information about the level for statistical significance and estimates of power when comparing the**  
 65 **outcomes.**  
 66 **Item 8<sup>T</sup>**  
 67 0: Study size was not calculated or not reported.  
 68 1: Study size was calculated, but the actual study size was smaller than the calculated size.  
 69 2: Study size was calculated and the actual study size was equal to or larger than the calculated size.  
 70  
 71 **9. An adequate control group: having a gold standard diagnostic test or therapeutic intervention as the**  
 72 **optimal intervention according to the available published data.**  
 73 **Item 9**  
 74 0: Characteristics of control group not reported  
 75 1: Control group assessed as inadequate by the authors  
 76 2: Control group assessed as adequate by the authors  
 77  
 78 **10. Contemporary groups: control and study group should be managed during the same time period (no**  
 79 **historical comparison).**  
 80 **Item 10**  
 81 0: Not reported if groups were contemporary or not  
 82 1: Reported but not contemporary groups  
 83 2: Contemporary groups  
 84  
 85 **11. Baseline equivalence of groups: the groups should be similar regarding the criteria other than the studied**  
 86 **endpoints. Absence of confounding factors that could bias the interpretation of the results**  
 87 **Item 11**  
 88 0: Baseline equivalence of groups not reported  
 89 1: Baseline equivalence of groups was not met, but demographic variables were reported.  
 90 2: Baseline equivalence of groups was observed. If the sex and age of the groups were reported and were  
 91 statistically equal among the groups, they were deemed as adequate. Alternatively, if statistical methods were  
 92 employed to adjust for sex and age, this would award two points.  
 93  
 94 **12. Adequate statistical analyses: whether the statistics were in accordance with the type of study with**  
 95 **calculation of confidence intervals or relative risk.**  
 96 **Item 12**  
 97 0: No statistical analyses were performed.  
 98 1: Statistical analyses were performed, but no p-value was presented or statistics did not adjust for the  
 99 relevant potential confounders (including sex and age) in the event of unequal baseline characteristics.  
 100 2: Relevant statistical analyses were performed and a p-value was presented. If baseline equivalence was not  
 101 met between the groups, the statistical analysis had to consider relevant potential confounders (including sex  
 102 and age).  
 103  


---

 104  
 105 ACL, anterior cruciate ligament, GJH, generalised joint hypermobility  
 106  
 107 <sup>P</sup> The intention-to-treat aspect was deemed irrelevant for the majority of the included studies and was  
 108 therefore not considered in order to avoid bias.  
 109 <sup>Q</sup> A study was considered to be blinded as long as some part of the treatment was blinded; the surgery per se  
 110 did not need to be blinded.  
 111 <sup>R</sup> If the mean follow-up is not reported, the minimum follow-up is used instead.

- 112 <sup>s</sup> Only used when a major endpoint was clearly stated  
113 <sup>t</sup> Any calculation of study size was accepted. The calculation of study size had to be performed for at least one  
114 of the outcomes, but it was not necessary for all outcomes.
-
