# Supplementary material for: Generalised joint hypermobility increases ACL injury risk and is associated with inferior outcome after ACL reconstruction: a systematic review
Source: PubMed Central journal article supplement — BMJ Open Sport Exerc Med. 2019 Nov 10;5(1):e000620. doi: 10.1136/bmjsem-2019-000620 (PMC6863654; doi:10.1136/bmjsem-2019-000620), 2019-11-10
Supplement: bmjsem-2019-000620supp002.pdf [file bmjsem-2019-000620supp002.pdf]

## 1 Supplementary material

2

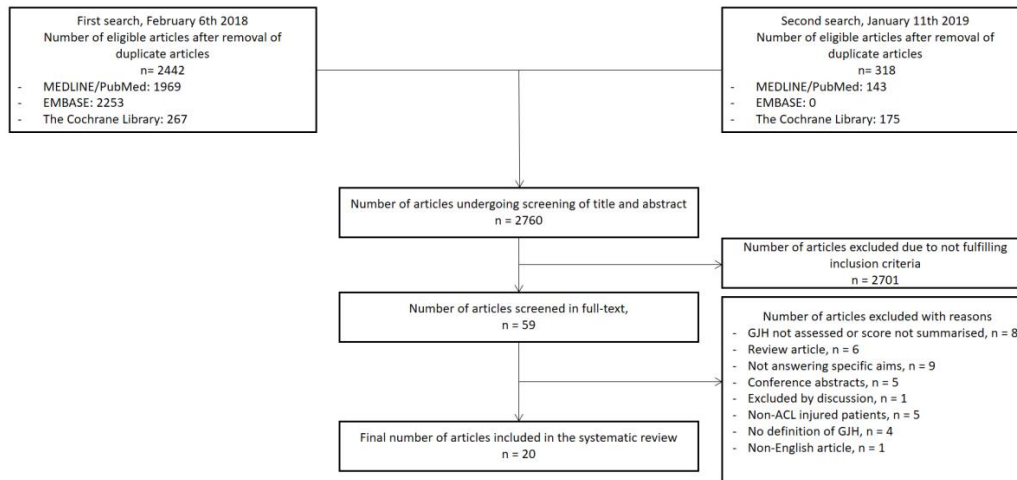

3

4 Supplementary Figure 1. Flow-chart of the study selection process. GJH generalised joint hypermobility, ACL anterior cruciate ligament

5

6

7

8

9

10

11

12

13

14

15

16

17

18

19

20

21

22

23

24

| <b>Supplementary table 1 – Search strategies stratified according to database.</b>                |                                                                                                                                                              |
|---------------------------------------------------------------------------------------------------|--------------------------------------------------------------------------------------------------------------------------------------------------------------|
| <b>PubMed</b>                                                                                     |                                                                                                                                                              |
| #1                                                                                                | anterior cruciate ligament* OR ACL                                                                                                                           |
| #2                                                                                                | "Anterior Cruciate Ligament"[Mesh]                                                                                                                           |
| #3                                                                                                | "Anterior Cruciate Ligament Injuries"[Mesh]                                                                                                                  |
| #4                                                                                                | #1 OR #2 OR #3                                                                                                                                               |
| #5                                                                                                | laxity OR hypermobility OR GJH OR GJL OR beighton OR generalized OR generalised                                                                              |
| #6                                                                                                | #4 AND #5                                                                                                                                                    |
| <b>EMBASE</b>                                                                                     |                                                                                                                                                              |
| #1                                                                                                | 'anterior cruciate ligament*':ti,ab,kw OR 'acl':ti,ab,kw                                                                                                     |
| #2                                                                                                | 'anterior cruciate ligament'/exp OR 'anterior cruciate ligament injury'/exp                                                                                  |
| #3                                                                                                | #1 OR #2                                                                                                                                                     |
| #4                                                                                                | 'laxity':ti,ab,kw OR 'hypermobility':ti,ab,kw OR 'gjh':ti,ab,kw OR 'gjl':ti,ab,kw OR 'beighton':ti,ab,kw OR 'generalized':ti,ab,kw OR 'generalised':ti,ab,kw |
| #5                                                                                                | #3 AND #4                                                                                                                                                    |
| <b>The Cochrane Library</b>                                                                       |                                                                                                                                                              |
| #1                                                                                                | anterior cruciate ligament* or ACL:ti,ab,kw                                                                                                                  |
| #2                                                                                                | laxity or hypermobility or GJH or GJL or beighton or generalized or generalised:ti,ab,kw                                                                     |
| #3                                                                                                | #1 AND #2                                                                                                                                                    |
| ACL anterior cruciate ligament, GJH generalised joint hypermobility, GJL generalised joint laxity |                                                                                                                                                              |

25

26

27

28

29

30

31

32

33

34

35

36

37

38

39

40

41

42

43

44

45

46

| <b>Supplementary table 2. Methods for evaluation of generalised joint hypermobility.</b> |                                                                                                                                                                                                                                                                                                                                                                |                                                                                                                                                                                                                                                                                                                           |                                                                                                               |                                        |
|------------------------------------------------------------------------------------------|----------------------------------------------------------------------------------------------------------------------------------------------------------------------------------------------------------------------------------------------------------------------------------------------------------------------------------------------------------------|---------------------------------------------------------------------------------------------------------------------------------------------------------------------------------------------------------------------------------------------------------------------------------------------------------------------------|---------------------------------------------------------------------------------------------------------------|----------------------------------------|
| <b>Evaluation method</b>                                                                 | <b>Used by authors</b>                                                                                                                                                                                                                                                                                                                                         | <b>Joints examined</b>                                                                                                                                                                                                                                                                                                    | <b>Dichotomisation limit used to define GJH</b>                                                               | <b>Easily reproducible methodology</b> |
| <b>Beighton and Horan score</b>                                                          | Kim et al. <sup>5, 8, 9</sup>                                                                                                                                                                                                                                                                                                                                  | TOTAL 5 POINTS<br>Passive dorsiflexion of little finger beyond 90°<br>Passive apposition of thumb to flexor aspect of the forearm<br>Hyperextension of elbow beyond 10°<br>Hyperextension of knee beyond 10°<br>Forward flexion of the trunk with knees straight so that the palms of the hand rest easily on the floor   | ≥4 <sup>5, 8</sup>                                                                                            | Yes <sup>5, 8, 9</sup>                 |
| <b>Beighton hypermobility score</b>                                                      | Akhtar et al. <sup>1 P</sup><br>Anderson et al. <sup>2 Q</sup><br>Astur et al. <sup>3</sup><br>Kramer et al. <sup>10</sup><br>Ramesh et al. <sup>14</sup><br>Scerpella et al. <sup>15</sup><br>Uhorchak et al. <sup>20 S</sup><br>Vacek et al. <sup>21</sup><br>Vaishya et al. <sup>22</sup><br>Kim et al. <sup>6, 7 T</sup><br>Shimozaki et al. <sup>17</sup> | TOTAL 9 POINTS<br>Passive dorsiflexion of little finger beyond 90°<br>Passive apposition of thumb to flexor aspect of the forearm<br>Hyperextension of elbow beyond 10°<br>Hyperextension of knee beyond 10°<br>Forward flexion of the trunk, with knees straight, so that the palms of the hand rest easily on the floor | ≥4/8 <sup>6, 7</sup> ≥4/9 <sup>1, 3 22</sup><br>≥5/9 <sup>20</sup> , ≥6/9 <sup>1</sup> ,<br>>6/9 <sup>2</sup> | Yes                                    |
| <b>Harners method</b>                                                                    | Harner et al. <sup>4</sup>                                                                                                                                                                                                                                                                                                                                     | TOTAL POINTS NA<br>The amount of passive dorsiflexion of little finger beyond 90° measured in degrees<br>Passive apposition of thumb to flexor aspect of the forearm, distance measured in centimeters<br>Hyperextension of elbow beyond 0° measured in degrees                                                           | N/A                                                                                                           | Yes                                    |
| <b>Larsons method</b>                                                                    | Larson et al. <sup>11</sup>                                                                                                                                                                                                                                                                                                                                    | TOTAL 4 POINTS<br>Fifth MCP joint hyperextension angle greater than 90°<br>Thumb can reach the forearm or the thenar eminence can reach the forearm<br>Elbow hyperextension measure 10° or greater<br>Knee hyperextension measure 10° or greater<br>OR heel height form table was greater than 5-cm.                      | ≥ 3/4                                                                                                         | Yes                                    |
| <b>Method according to Fukubayashi</b>                                                   | Motohashi et al. <sup>12</sup>                                                                                                                                                                                                                                                                                                                                 | TOTAL 7 POINTS<br>Passive apposition of the thumb to flexor aspect of the forearm<br>Hyperextension of the knee equal to or beyond 10°<br>Forward flexion of the trunk with knees straight so that the palms of the hand rest easily on the floor                                                                         | NI                                                                                                            | No                                     |

|                                                                                                                                                                                                                                                                                       |                                                                |                                                                                                                                                                                                                                                                                              |                      |     |
|---------------------------------------------------------------------------------------------------------------------------------------------------------------------------------------------------------------------------------------------------------------------------------------|----------------------------------------------------------------|----------------------------------------------------------------------------------------------------------------------------------------------------------------------------------------------------------------------------------------------------------------------------------------------|----------------------|-----|
|                                                                                                                                                                                                                                                                                       |                                                                | Hyperextension of elbow equal to or beyond 15°<br>Gripping hands behind the back, with one upper arm elevated and the other upper arm in parallel to the trunk.<br>Dorsiflexion of the ankle equal to or beyond 45°<br>Over pivot test of the hips                                           |                      |     |
| <b>Modified Beighton hypermobility score</b>                                                                                                                                                                                                                                          | Scerpella et al. <sup>15</sup> Stijak et al. <sup>18, 19</sup> | TOTAL 9 POINTS<br>Extension of the fifth MCP beyond 90°<br>Hyperextension of the elbow beyond 0°<br>Hyperextension of the knee beyond 0°<br>The ability to touch the thumb to the forearm with the wrist flexed<br>The ability to touch the palms to the floor with the knees fully extended | ≥5 <sup>18, 19</sup> | Yes |
| ACL Anterior cruciate ligament, GJH generalised joint hypermobility, MCP Metacarpophalangeal, N/A not applicable, NI no information                                                                                                                                                   |                                                                |                                                                                                                                                                                                                                                                                              |                      |     |
| <p><sup>P</sup> With use of <i>injury allowance point</i><sup>41, Q</sup> Without knee hyperextension, <sup>R</sup> Unknown if tests were performed bilaterally <sup>S</sup> Did not involve the palm to floor test <sup>T</sup> Excluding the assessment of the ACL injured knee</p> |                                                                |                                                                                                                                                                                                                                                                                              |                      |     |

47

48

49

50

51

52

53

54

55

56

57

58

59

60

61

62

63

64

65

66

67

68

69

**Supplementary table 3. Bilateral ACL injury.**

| Author                                  | Patients,<br>(n male) | Mean Hypermobility Score <sup>P</sup> |                             |          | Bilateral/contralateral ACL<br>injury, % of total |                     | <i>p</i> -<br>value | Consideration<br>for<br>differences in<br>sex and age |
|-----------------------------------------|-----------------------|---------------------------------------|-----------------------------|----------|---------------------------------------------------|---------------------|---------------------|-------------------------------------------------------|
|                                         |                       | Bilateral<br>ACL<br>injury            | Unilateral<br>ACL<br>injury | Controls | Hypermobile                                       | Non-<br>hypermobile |                     |                                                       |
| Anderson<br>et al. <sup>2</sup>         | 31 (18)               | 1.9                                   |                             | 1.2      |                                                   |                     | n.s.                | S&A<br>matched <sup>R</sup>                           |
| Larson et<br>al. <sup>11</sup>          | 183 (81)              |                                       |                             |          | 9.8                                               | 4.2                 | n.s.                | No                                                    |
| Motohashi<br>et al. <sup>12</sup>       | 48 (0)                | 3.3, SD<br>± 1.4                      | 2.2, SD ±<br>1.4            |          |                                                   |                     | <0.05               | No                                                    |
| Kim et al. <sup>6</sup><br><sup>P</sup> | 189 (NI)              |                                       |                             |          | 5.1                                               | 1.4                 | n.s.                | S&A<br>equivalence <sup>5</sup>                       |
| Kim et al. <sup>7</sup><br><sup>Q</sup> | 108 (NI)              |                                       |                             |          | 11.4                                              | 5.6                 | n.s.                | S&A<br>equivalence <sup>5</sup>                       |

ACL anterior cruciate ligament, NI no information, n.s. not significant, SD standard deviation, S&A sex and age

<sup>P</sup> Results from all patients, irrespective of graft, allocated to group based on presence of hypermobility at the 5-year follow-up. <sup>Q</sup> Results from 8-year follow-up presented. <sup>R</sup> The authors state that matching was performed but baseline equivalence not reported, <sup>5</sup> Baseline equivalence for sex and age observed

70

71

72

73

74

75

76

77

78

79

80

81

82

83

84

85

86

87

88

89

| Supplementary table 4. Graft failure.                                                                                                                                                                                                                                                                                                                                                                                                                                                                                                                                                                                                                                                                                                                                                                                                                                                       |                    |                      |                          |                    |          |                            |                              |        |                              |                                              |
|---------------------------------------------------------------------------------------------------------------------------------------------------------------------------------------------------------------------------------------------------------------------------------------------------------------------------------------------------------------------------------------------------------------------------------------------------------------------------------------------------------------------------------------------------------------------------------------------------------------------------------------------------------------------------------------------------------------------------------------------------------------------------------------------------------------------------------------------------------------------------------------------|--------------------|----------------------|--------------------------|--------------------|----------|----------------------------|------------------------------|--------|------------------------------|----------------------------------------------|
| Authors                                                                                                                                                                                                                                                                                                                                                                                                                                                                                                                                                                                                                                                                                                                                                                                                                                                                                     | Patients, n (male) | Type of graft        | Mean hypermobility score |                    |          | Graft rupture (% of total) |                              |        | p-value                      | Consideration for differences in sex and age |
|                                                                                                                                                                                                                                                                                                                                                                                                                                                                                                                                                                                                                                                                                                                                                                                                                                                                                             |                    |                      | Graft failure            | Primary ACL injury | Controls | Hypermobile group, n (%)   | Non-hypermobile group, n (%) |        |                              |                                              |
| Akhtar et al. <sup>1</sup>                                                                                                                                                                                                                                                                                                                                                                                                                                                                                                                                                                                                                                                                                                                                                                                                                                                                  | 209 (157)          | Various <sup>P</sup> | 4                        | 2.9                |          |                            |                              |        | =0.01                        | S&A matched <sup>T</sup>                     |
|                                                                                                                                                                                                                                                                                                                                                                                                                                                                                                                                                                                                                                                                                                                                                                                                                                                                                             |                    |                      | 4                        |                    | 1.4      |                            |                              |        | <0.001                       |                                              |
| Kim et al. <sup>6 Q</sup>                                                                                                                                                                                                                                                                                                                                                                                                                                                                                                                                                                                                                                                                                                                                                                                                                                                                   | 189 (NI)           | PT                   |                          |                    |          | 3 (7.9)                    | 1 (1.0)                      | n.s.   | S&A equivalence <sup>U</sup> |                                              |
|                                                                                                                                                                                                                                                                                                                                                                                                                                                                                                                                                                                                                                                                                                                                                                                                                                                                                             |                    | HT                   |                          |                    |          | 2 (9.5)                    | 1 (2.3)                      | n.s.   |                              |                                              |
| Kim et al. <sup>7</sup>                                                                                                                                                                                                                                                                                                                                                                                                                                                                                                                                                                                                                                                                                                                                                                                                                                                                     | 108 (NI)           | PT                   |                          |                    |          | 4 (11.4)                   | 4 (4.4)                      | n.s.   | S&A equivalence <sup>U</sup> |                                              |
| Larson et al. <sup>11</sup>                                                                                                                                                                                                                                                                                                                                                                                                                                                                                                                                                                                                                                                                                                                                                                                                                                                                 | 183 (81)           | All <sup>5</sup>     |                          |                    |          | 10 (24.4)                  | 11 (7.7)                     | =0.006 | No                           |                                              |
|                                                                                                                                                                                                                                                                                                                                                                                                                                                                                                                                                                                                                                                                                                                                                                                                                                                                                             |                    | HT                   |                          |                    |          | 3 (25.0)                   | 9 (12.3)                     | n.s.   |                              |                                              |
|                                                                                                                                                                                                                                                                                                                                                                                                                                                                                                                                                                                                                                                                                                                                                                                                                                                                                             |                    | PT                   |                          |                    |          | 4 (21.1)                   | 0 (0)                        | =0.24  |                              |                                              |
|                                                                                                                                                                                                                                                                                                                                                                                                                                                                                                                                                                                                                                                                                                                                                                                                                                                                                             |                    | AG                   |                          |                    |          | 3 (30)                     | 2 (4.8)                      | =0.043 |                              |                                              |
| <p>In case of reporting of graft failure in the same cohort with different lengths of follow-up, the results of the longest follow-up time were reported. ACL anterior cruciate ligament, AG Allograft, HT Hamstring tendon autograft, NI no information, n.s. not significant, PT Patellar tendon autograft, S&amp;A sex and age, *The exact follow-up time was not disclosed</p> <p><sup>P</sup> Quadruple hamstring tendon, patellar tendon and fascia lata autografts were used, <sup>Q</sup> Results from the Bonferroni analysis at the 5-year follow-up presented, <sup>R</sup> Results from the 8-year follow-up presented. <sup>S</sup> Summarizing all grafts (hamstring tendon, patellar tendon and allografts) <sup>T</sup> The authors state that matching was performed but baseline equivalence not reported, <sup>U</sup> Baseline equivalence for sex and age observed</p> |                    |                      |                          |                    |          |                            |                              |        |                              |                                              |

90

91

92

93

94

95

96

97

98

99

100

101

102

103

104

105

106

| Supplementary table 5. Radiographic evaluations. |                                                       |                          |               |                   |         |
|--------------------------------------------------|-------------------------------------------------------|--------------------------|---------------|-------------------|---------|
| Authors                                          |                                                       | Follow-up time           | Hypermobility | Non-hypermobility | P-value |
| Kim et al. <sup>6</sup>                          | IKDC radiographic grade, PT graft (% with A, B, C, D) | Min 2 years <sup>P</sup> | 93, 7, 0, 0   | 96, 4, 0, 0       | n.s.    |
|                                                  |                                                       | 5 years <sup>P</sup>     | 73, 24, 3, 0  | 81, 19, 0, 0      | n.s.    |
|                                                  | IKDC radiographic grade, HT graft (% with A, B, C, D) | Min 2 years <sup>P</sup> | 95, 5, 0, 0   | 96, 4, 0, 0       | n.s.    |
|                                                  |                                                       | 5 years <sup>P</sup>     | 67, 28, 6, 0  | 78, 22, 0, 0      | n.s.    |
| Kim et al. <sup>7</sup>                          | IKDC radiographic grade, PT graft (% with A, B, C, D) | 8 years <sup>P</sup>     | 63, 30, 7, 0  | 72, 25, 4, 0      | n.s.    |

IKDC International Knee Documentation Committee, Min Minimum PT Patellar tendon, HT hamstring tendon

<sup>P</sup> The exact follow-up time was not reported.

107

108

- 109 1. Akhtar MA, Bhattacharya R, Keating JF. Generalised ligamentous laxity and revision ACL  
110 surgery: Is there a relation? *Knee*.23(6):1148-1153.
- 111 2. Anderson AF, Lipscomb AB, Liudahl KJ, Addlestone RB. Analysis of the intercondylar notch by  
112 computed tomography. *Am J Sports Med*.15(6):547-552.
- 113 3. Astur DC, Lara PHS, Santos MA, Oliveira GT, Arliani GG, Cohen M. Influence of Joint  
114 Hypermobility on Postoperative Results of Knee Surgery. *Acta Ortop Bras*. 2018;26(1):19-21.
- 115 4. Harner CD, Paulos LE, Greenwald AE, Rosenberg TD, Cooley VC. Detailed analysis of patients  
116 with bilateral anterior cruciate ligament injuries. *Am J Sports Med*.22(1):37-43.
- 117 5. Kim SJ, Chang JH, Kim TW, Jo SB, Oh KS. Anterior cruciate ligament reconstruction with use of  
118 a single or double-bundle technique in patients with generalized ligamentous laxity. *J Bone  
119 Joint Surg Am*.91(2):257-262.
- 120 6. Kim SJ, Choi CH, Kim SH, et al. Bone-patellar tendon-bone autograft could be recommended  
121 as a superior graft to hamstring autograft for ACL reconstruction in patients with generalized  
122 joint laxity: 2- and 5-year follow-up study. *Knee Surg Sports Traumatol Arthrosc*.  
123 2018;26(9):2568-2579.
- 124 7. Kim SJ, Choi CH, Lee SK, Lee W, An H, Jung M. Minimum Two-Year Follow-up of Anterior  
125 Cruciate Ligament Reconstruction in Patients with Generalized Joint Laxity. *J Bone Joint Surg  
126 Am*. 2018;100(4):278-287.
- 127 8. Kim SJ, Kim TE, Lee DH, Oh KS. Anterior cruciate ligament reconstruction in patients who  
128 have excessive joint laxity. *J Bone Joint Surg Am*.90(4):735-741.
- 129 9. Kim SJ, Moon HK, Kim SG, Chun YM, Oh KS. Does severity or specific joint laxity influence  
130 clinical outcomes of anterior cruciate ligament reconstruction? *Clin Orthop Relat  
131 Res*.468(4):1136-1141.
- 132 10. Kramer LC, Denegar CR, Buckley WE, Hertel J. Factors associated with anterior cruciate  
133 ligament injury: history in female athletes. *J Sports Med Phys Fitness*.47(4):446-454.
- 134 11. Larson CM, Bedi A, Dietrich ME, et al. Generalized Hypermobility, Knee Hyperextension, and  
135 Outcomes After Anterior Cruciate Ligament Reconstruction: Prospective, Case-Control Study  
136 With Mean 6 Years Follow-up. *Arthroscopy*.33(10):1852-1858.
- 137 12. Motohashi M. Profile of bilateral anterior cruciate ligament injuries: a retrospective follow-  
138 up study. *J Orthop Surg (Hong Kong)*.12(2):210-215.
- 139 13. Myer GD, Ford KR, Paterno MV, Nick TG, Hewett TE. The effects of generalized joint laxity on  
140 risk of anterior cruciate ligament injury in young female athletes. *Am J Sports  
141 Med*.36(6):1073-1080.
- 142 14. Ramesh R, Von Arx O, Azzopardi T, Schranz PJ. The risk of anterior cruciate ligament rupture  
143 with generalised joint laxity. *J Bone Joint Surg Br*.87(6):800-803.
- 144 15. Scerpella TA, Stayer TJ, Makhuli BZ. Ligamentous laxity and non-contact anterior cruciate  
145 ligament tears: a gender-based comparison. *Orthopedics*.28(7):656-660.

- 146 **16.** Sgaglione NA, Warren RF, Wickiewicz TL, Gold DA, Panariello RA. Primary repair with  
147 semitendinosus tendon augmentation of acute anterior cruciate ligament injuries. *Am J*  
148 *Sports Med.*18(1):64-73.
- 149 **17.** Shimozaki K, Nakase J, Takata Y, Shima Y, Kitaoka K, Tsuchiya H. Greater body mass index and  
150 hip abduction muscle strength predict noncontact anterior cruciate ligament injury in female  
151 Japanese high school basketball players. *Knee Surg Sports Traumatol Arthrosc.*  
152 2018;26(10):3004-3011.
- 153 **18.** Stijak L, Kadija M, Djulejic V, et al. The influence of sex hormones on anterior cruciate  
154 ligament ruptures in males. *Knee Surg Sports Traumatol Arthrosc.*23(12):3578-3584.
- 155 **19.** Stijak L, Kadija M, Djulejic V, et al. The influence of sex hormones on anterior cruciate  
156 ligament rupture: female study. *Knee Surg Sports Traumatol Arthrosc.*23(9):2742-2749.
- 157 **20.** Uhorchak JM, Scoville CR, Williams GN, Arciero RA, St Pierre P, Taylor DC. Risk factors  
158 associated with noncontact injury of the anterior cruciate ligament: a prospective four-year  
159 evaluation of 859 West Point cadets. *Am J Sports Med.*31(6):831-842.
- 160 **21.** Vacek PM, Slaughterbeck JR, Tourville TW, et al. Multivariate Analysis of the Risk Factors for  
161 First-Time Noncontact ACL Injury in High School and College Athletes: A Prospective Cohort  
162 Study With a Nested, Matched Case-Control Analysis. *Am J Sports Med.*44(6):1492-1501.
- 163 **22.** Vaishya R, Hasija R. Joint hypermobility and anterior cruciate ligament injury. *J Orthop Surg*  
164 *(Hong Kong).*21(2):182-184.
- 165
- 166
